# Supplementary material for: Synthesis, supramolecular structures and catalytic properties of nickel(II) 3-sulfobenzoate complexes with chelating amine ligands
Source: Royal Society of Chemistry journal article supplement (doi:10.1039/b907453h), 2009-01-01
Supplement: b907453h.pdf [file b907453h.pdf]

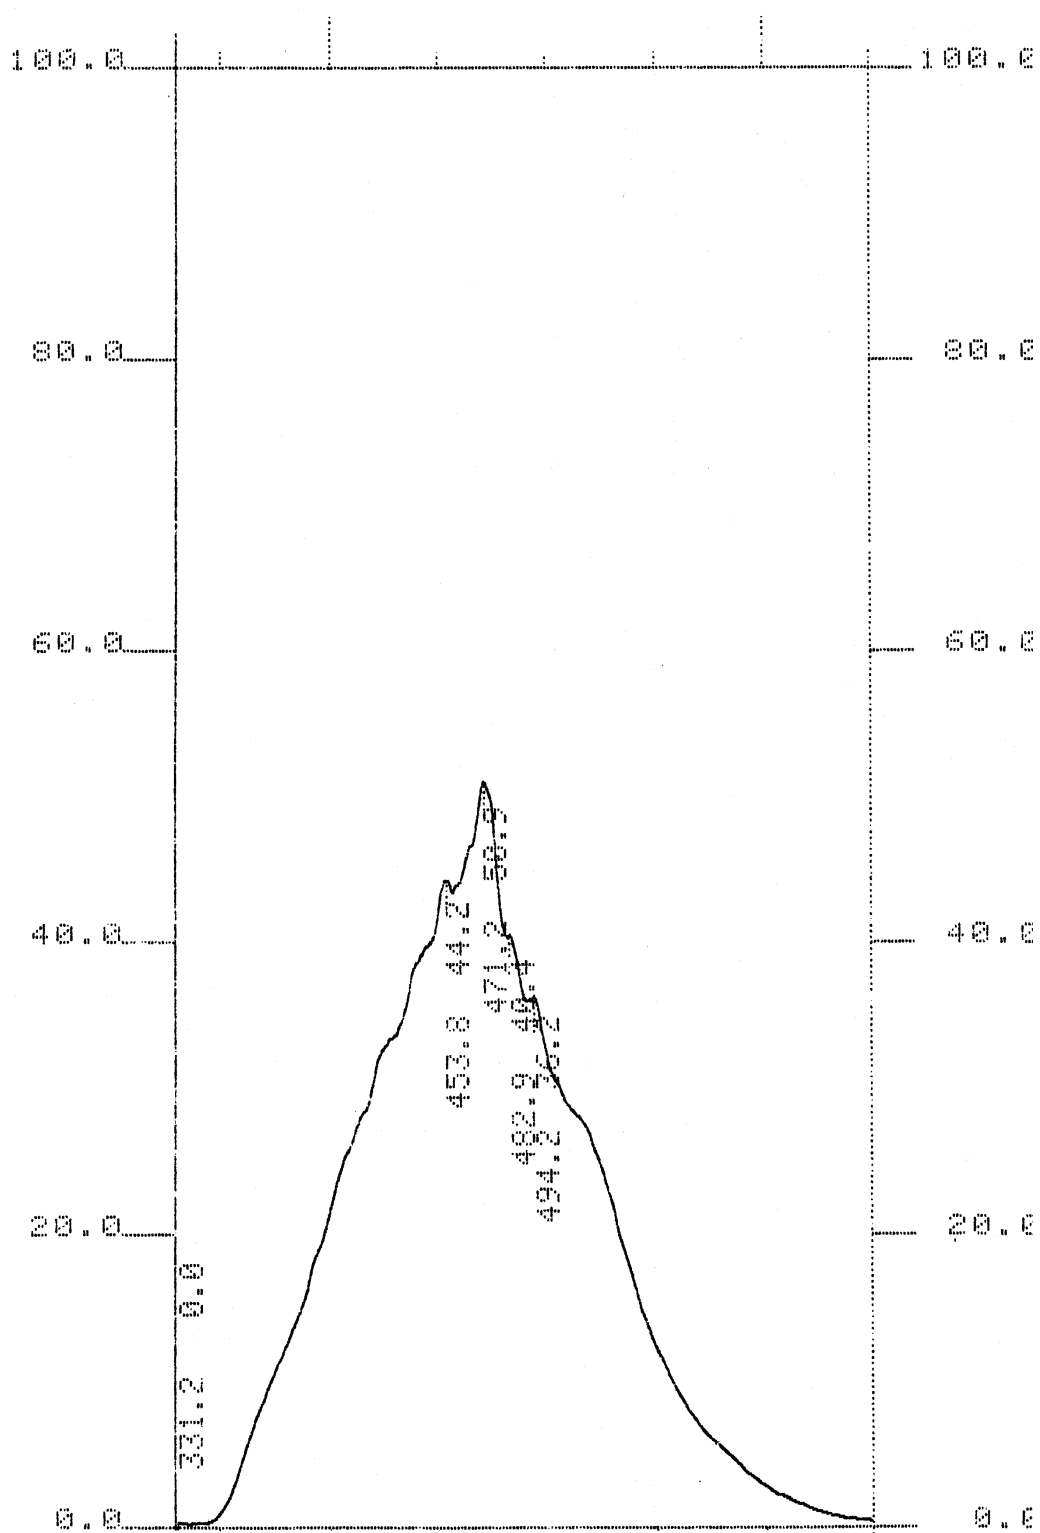

Figure S1. Fluorescence spectrum of complex 1.

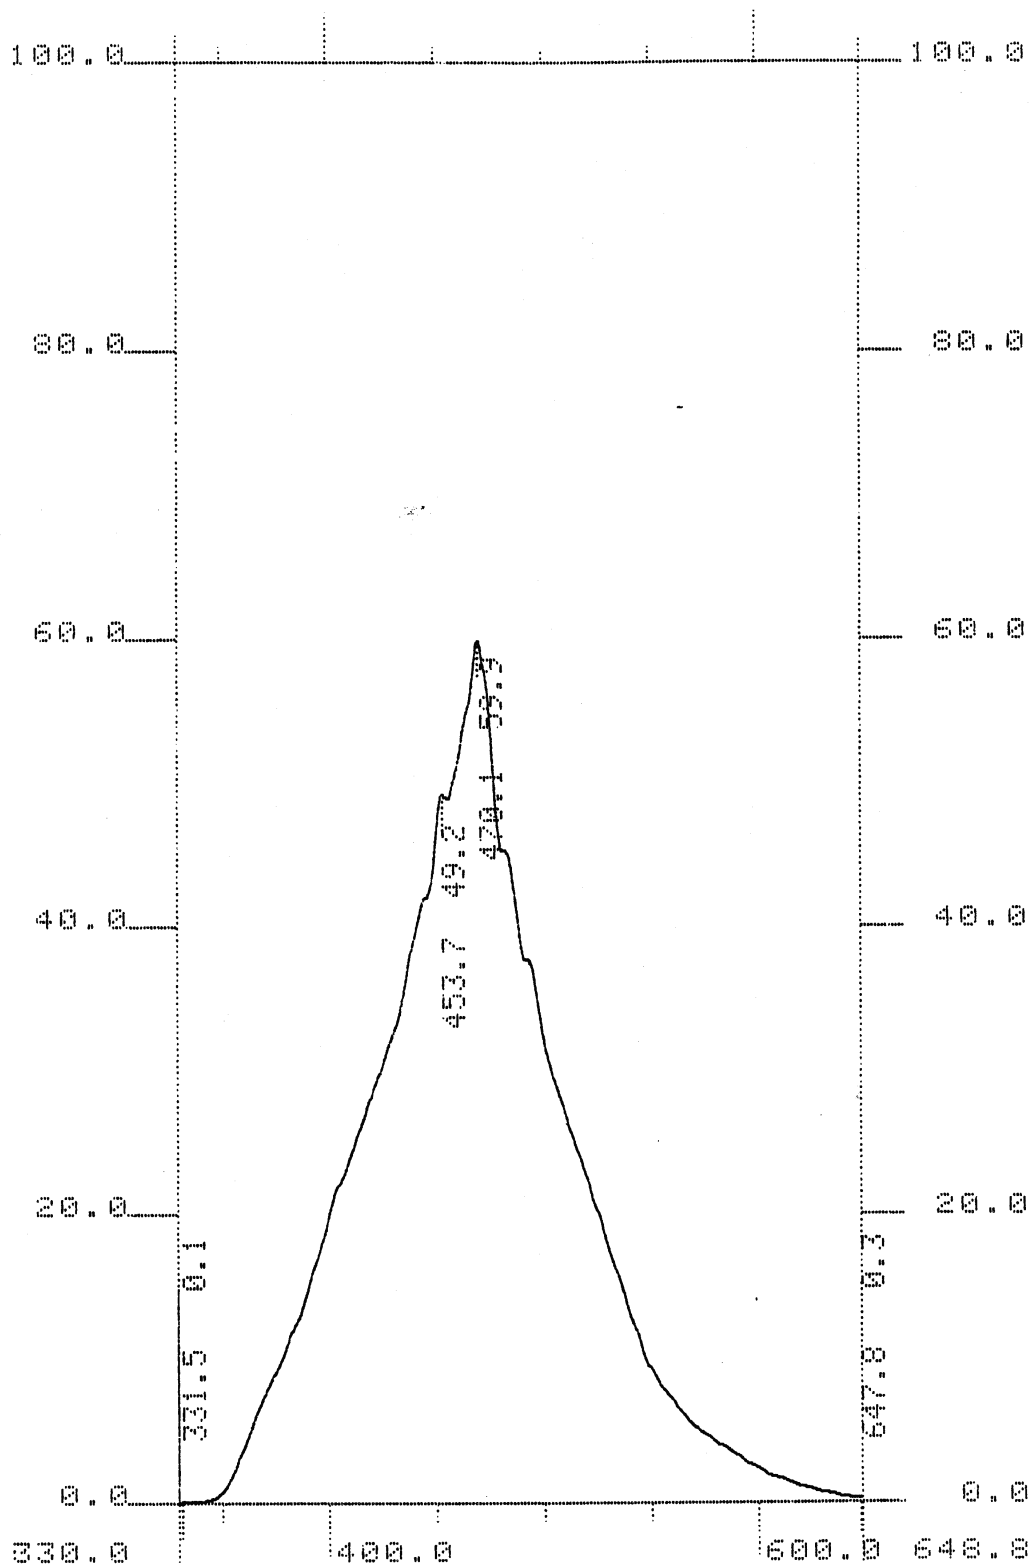

Figure S2. Fluorescence spectrum of complex 2.

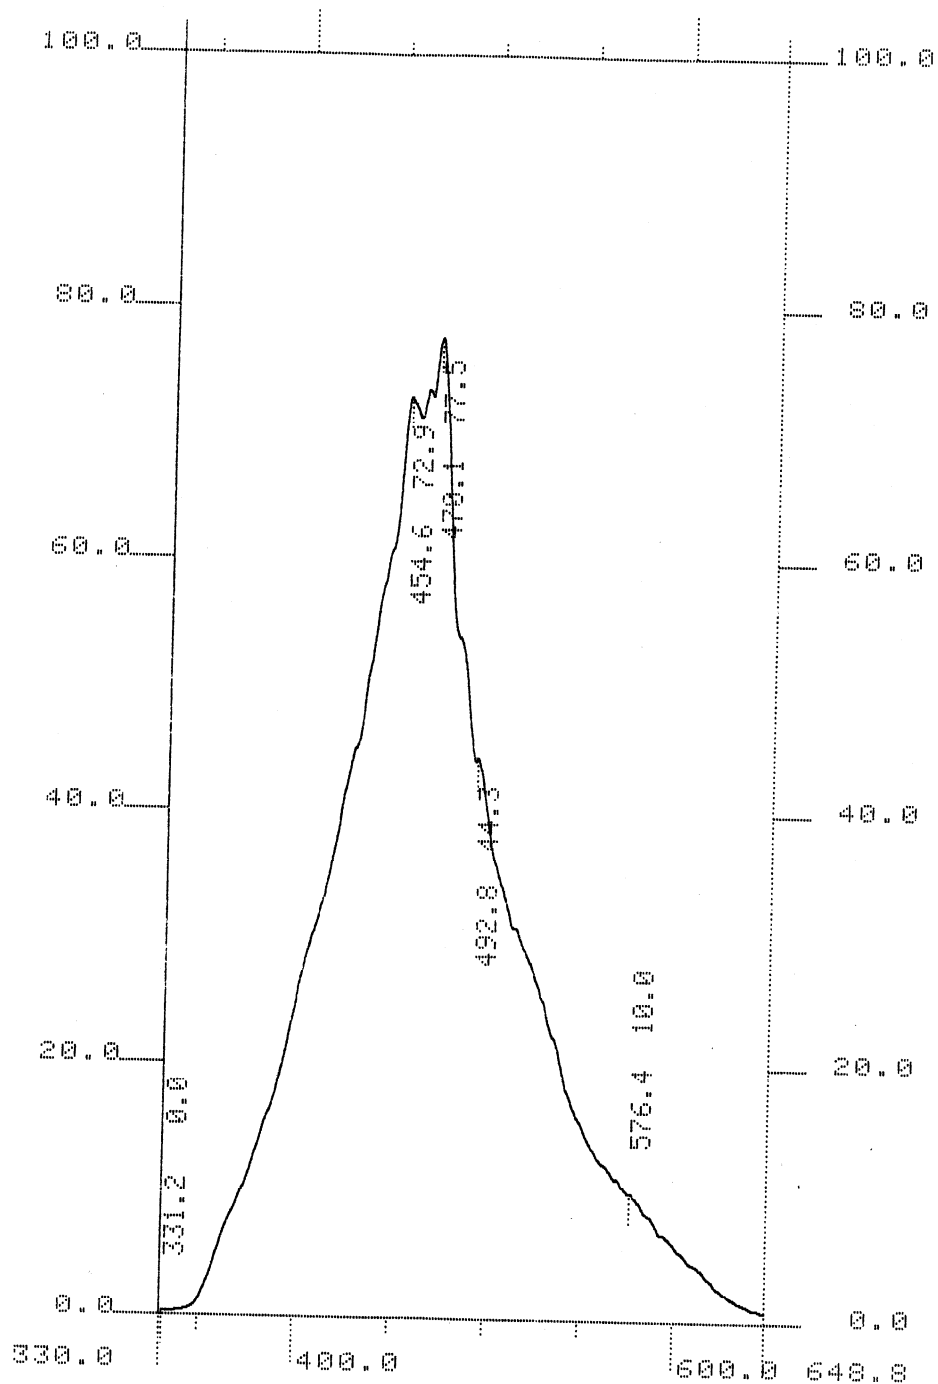

Figure S3. Fluorescence spectrum of complex 3.

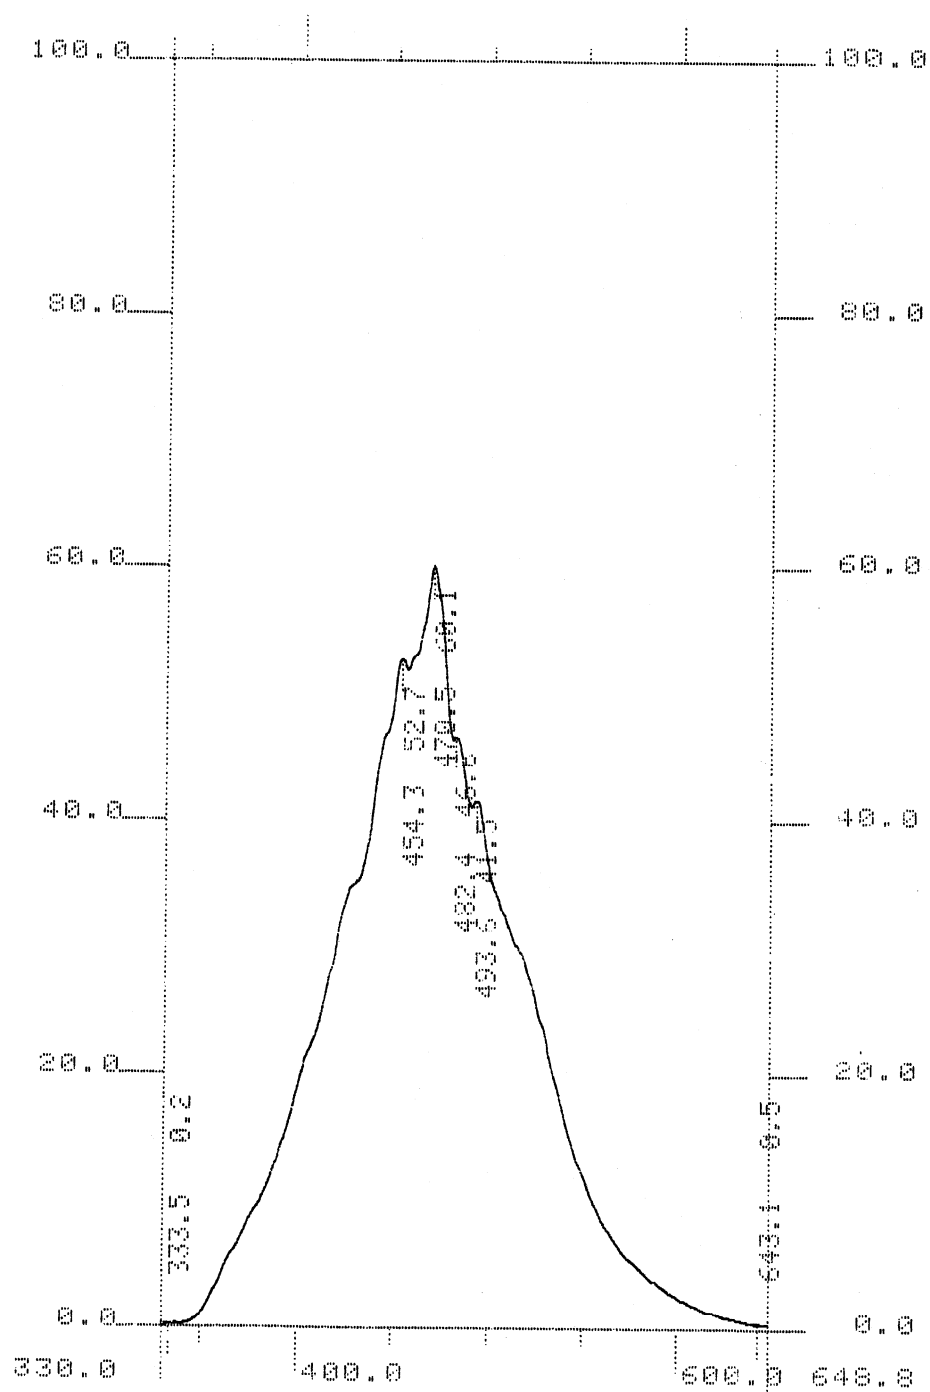

Figure S4. Fluorescence spectrum of complex 4.

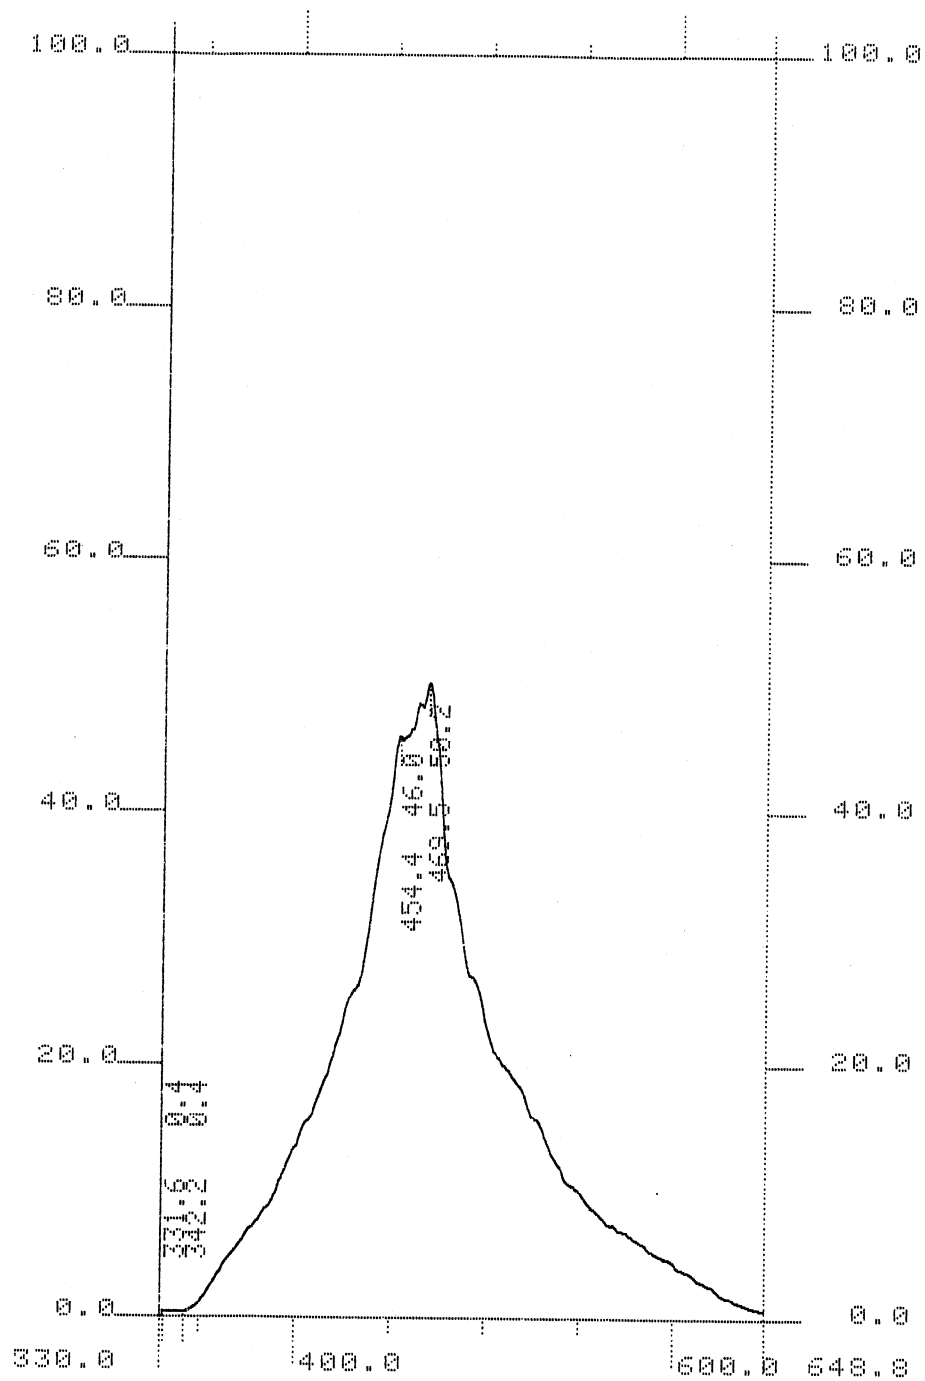

Figure S5. Fluorescence spectrum of complex 5.

**Table S1.** Selected Bond Angles (°) for Complex 1

|                         |           |                         |            |
|-------------------------|-----------|-------------------------|------------|
| O1-Ni1-O3 <sup>i</sup>  | 83.15(8)  | O1-Ni1-O6               | 92.49(9)   |
| O1-Ni1-O7               | 92.42(8)  | O1-Ni1-N1               | 174.35(9)  |
| O1-Ni1-N2               | 95.37(10) | O3 <sup>i</sup> -Ni1-O6 | 85.03(8)   |
| O3 <sup>i</sup> -Ni1-O7 | 175.46(8) | O3 <sup>i</sup> -Ni1-N1 | 93.55(8)   |
| O3 <sup>i</sup> -Ni1-N2 | 92.64(9)  | O6-Ni1-O7               | 94.20(9)   |
| O6-Ni1-N1               | 91.79(9)  | O6-Ni1-N2               | 171.48(10) |
| O7-Ni1-N1               | 90.95(9)  | O7-Ni1-N2               | 88.76(9)   |
| N1-Ni1-N2               | 80.16(9)  |                         |            |

Symmetry code, i: x, 1.5-y, z-0.5.

**Table S2.** Selected Bond Angles (°) for Complex 2

|           |            |           |           |
|-----------|------------|-----------|-----------|
| O1-Ni1-O6 | 90.66(14)  | O1-Ni1-N1 | 91.88(15) |
| O1-Ni1-N2 | 171.09(15) | O1-Ni1-N3 | 94.69(14) |
| O1-Ni1-N4 | 85.17(14)  | O6-Ni1-N1 | 87.46(16) |
| O6-Ni1-N2 | 89.69(15)  | O6-Ni1-N3 | 95.25(17) |
| O6-Ni1-N4 | 173.18(15) | N1-Ni1-N2 | 79.24(17) |
| N1-Ni1-N3 | 172.86(16) | N1-Ni1-N4 | 98.05(16) |
| N2-Ni1-N3 | 94.14(16)  | N2-Ni1-N4 | 95.27(15) |
| N3-Ni1-N4 | 79.75(16)  |           |           |

**Table S3.** Selected Bond Angles (°) for Complex 3

|           |            |           |            |
|-----------|------------|-----------|------------|
| N1-Ni1-N2 | 79.70(11)  | N1-Ni1-N3 | 97.10(10)  |
| N1-Ni1-N4 | 94.44(11)  | N1-Ni1-N5 | 168.06(10) |
| N1-Ni1-N6 | 92.98(10)  | N2-Ni1-N3 | 91.66(10)  |
| N2-Ni1-N4 | 168.31(10) | N2-Ni1-N5 | 92.14(11)  |
| N2-Ni1-N6 | 95.73(10)  | N3-Ni1-N4 | 78.95(11)  |
| N3-Ni1-N5 | 91.79(10)  | N3-Ni1-N6 | 168.43(11) |
| N4-Ni1-N5 | 95.08(11)  | N4-Ni1-N6 | 94.66(11)  |
| N5-Ni1-N6 | 79.08(11)  |           |            |

**Table S4.** Selected Bond Angles (°) for Complex 4

|                         |           |                         |           |
|-------------------------|-----------|-------------------------|-----------|
| O1-Ni1-O5 <sup>i</sup>  | 85.19(8)  | O1-Ni1-O6               | 93.27(8)  |
| O1-Ni1-O7               | 86.27(8)  | O1-Ni1-N1               | 174.61(7) |
| O1-Ni1-N2               | 95.35(8)  | O5 <sup>i</sup> -Ni1-O6 | 86.23(8)  |
| O5 <sup>i</sup> -Ni1-O7 | 171.29(7) | O5 <sup>i</sup> -Ni1-N1 | 96.13(8)  |
| O5 <sup>i</sup> -Ni1-N2 | 88.22(8)  | O6-Ni1-O7               | 92.55(8)  |
| O6-Ni1-N1               | 92.04(8)  | O6-Ni1-N2               | 169.32(8) |
| O7-Ni1-N1               | 92.54(8)  | O7-Ni1-N2               | 94.29(8)  |
| N1-Ni1-N2               | 79.48(8)  |                         |           |

Symmetry code, i: -1+x, y, -1+z.

**Table S5.** Selected Bond Angles (°) for Complex 5

|             |            |             |            |
|-------------|------------|-------------|------------|
| N1-Ni1-N2   | 78.63(10)  | N1-Ni1-N3   | 94.01(10)  |
| N1-Ni1-N4   | 93.35(10)  | N1-Ni1-N5   | 92.92(10)  |
| N1-Ni1-N6   | 167.01(10) | N2-Ni1-N3   | 169.93(10) |
| N2-Ni1-N4   | 94.90(10)  | N2-Ni1-N5   | 90.09(10)  |
| N2-Ni1-N6   | 91.70(10)  | N3-Ni1-N4   | 78.54(10)  |
| N3-Ni1-N5   | 97.19(10)  | N3-Ni1-N6   | 96.56(10)  |
| N4-Ni1-N5   | 172.65(10) | N4-Ni1-N6   | 96.14(10)  |
| N5-Ni1-N6   | 78.29(10)  | N7-Ni2-N8   | 78.43(11)  |
| N7-Ni2-N9   | 91.48(10)  | N7-Ni2-N10  | 93.57(11)  |
| N7-Ni2-N11  | 170.88(11) | N7-Ni2-N12  | 96.14(11)  |
| N8-Ni2-N9   | 94.64(10)  | N8-Ni2-N10  | 169.49(10) |
| N8-Ni2-N11  | 94.27(10)  | N8-Ni2-N12  | 92.37(10)  |
| N9-Ni2-N10  | 78.61(10)  | N9-Ni2-N11  | 94.59(10)  |
| N9-Ni2-N12  | 170.54(11) | N10-Ni2-N11 | 94.30(10)  |
| N10-Ni2-N12 | 95.28(10)  | N11-Ni2-N12 | 78.55(10)  |
